# Themed Issue Article: Conservation Physiology of Animal Migrations

## Leucocyte profiles of Arctic marine birds: correlates of migration and breeding phenology

Mark L. Mallory<sup>1,\*</sup>, Catherine M. Little<sup>1</sup>, Ellen S. Boyd<sup>1</sup>, Jennifer Ballard<sup>2</sup>, Kyle H. Elliott<sup>3</sup>, H. Grant Gilchrist<sup>4</sup>, J. Mark Hipfner<sup>5</sup>, Aevor Petersen<sup>6</sup> and Dave Shutler<sup>1</sup>

<sup>1</sup>Department of Biology, Acadia University, Wolfville, NS, Canada B4P 2R6

<sup>2</sup>Southeastern Cooperative Wildlife Disease Study, University of Georgia, 589 DW Brooks Drive, Athens, GA 30680, USA

<sup>3</sup>Natural Resource Sciences, McGill University, Ste. Anne de Bellevue, QC, Canada H9Z 3V9

<sup>4</sup>Wildlife Research Division, Environment Canada, National Wildlife Research Centre, Carleton University, Raven Road, Ottawa, ON, Canada K1A 0H3

<sup>5</sup>Wildlife Research Division, Environment Canada, 5421 Robertson Road, Delta, BC, Canada V4K 3N2

<sup>6</sup>Brautarland 2, 108 Reykjavik, Iceland

\*Corresponding author: Department of Biology, Acadia University, Wolfville, NS, Canada B4P 2R6. Tel: +1 902 585 1798.

Email: mark.mallory@acadiau.ca

Most Arctic marine birds are migratory, wintering south of the limit of annual pack ice and returning north each year for the physiologically stressful breeding season. The Arctic environment is changing rapidly due to global warming and anthropogenic activities, which may influence the timing of breeding in relation to arrival times following migration, as well as providing additional stressors (e.g. disturbance from ships) to which birds may respond. During stressful parts of their annual cycle, such as breeding, birds may reallocate resources so that they have increased heterophil-to-lymphocyte ratios in their white blood cell (leucocyte) profiles. We analysed leucocyte profiles of nine species of marine birds to establish reference ranges for these species in advance of future Arctic change. Leucocyte profiles tended to cluster among taxonomic groups across studies, suggesting that reference values for a particular group can be established, and within species there was evidence that birds from colonies that had to migrate farther had higher heterophil-to-lymphocyte ratios during incubation than those that did not have to travel as far, particularly for species with high wing loading.

**Key words:** Heterophil, leucocyte, lymphocyte, marine bird, stress

**Editor:** Steven Cooke

Received 16 March 2015; Revised 30 April 2015; accepted 7 May 2015

**Cite as:** Mallory ML, Little CM, Boyd ES, Ballard J, Elliott KH, Gilchrist HG, Hipfner JM, Petersen A, Shutler D (2015) Leucocyte profiles of Arctic marine birds: correlates of migration and breeding phenology. *Conserv Physiol* 3: doi:10.1093/conphys/cov028.

## Introduction

Influences of environmental stressors on animals are key areas of research in ecology and conservation. A fundamental premise of this research is that a stimulus in the environment places a stress on animals, which causes a behavioural or physiological change from baseline conditions (e.g. Vleck *et al.*, 2000;

Plischke *et al.*, 2010; Villanueva *et al.*, 2012). Detecting these reactions can be difficult, however, owing to a lack of baseline information for many species and because many baseline metrics, such as white blood cell (leucocyte) profiles, vary through the annual cycle and in response to environmental variation over a range of time scales (e.g. Lee, 2006; Plischke *et al.*, 2010; Dehnhard *et al.*, 2011). Consequently, sound use

of these metrics requires corresponding information on environmental conditions and stage of the annual cycle of the species, as well as baseline measures, for proper interpretation.

For many animals, breeding can be the most physiologically stressful part of their annual cycle, which can manifest itself as a trade-off between investment of body resources in self-maintenance vs. reproduction (Drent and Daan, 1980; Stearns, 1992). One place where animals might adjust investment is in their immune system. Although this system protects individuals against various diseases and parasites (Sheldon and Verhulst, 1996), the immune system may be adjusted during breeding to reallocate resources to other systems (Deerenberg *et al.*, 1997; Råberg *et al.*, 1998; Hanssen *et al.*, 2003; Lee, 2006; Davis *et al.*, 2008). Leucocytes are a key component of an animal's immune system, with different white blood cells offering protection against a variety of stressors (Maceda-Veiga *et al.*, 2015). In homeotherms, acquired immunity is provided by lymphocytes, tends to be pathogen specific and leads to antibody responses. In contrast, innate immunity is provided by monocytes and granulocytes (eosinophils, basophils and, especially, heterophils in birds and neutrophils in mammals) and is usually the first line of immune defense through phagocytosis of pathogens (Roitt *et al.*, 1993). During periods of stress, reallocation of immunity resources leads to increased heterophil-to-lymphocyte (H:L) ratios in avian white blood cell profiles and occurs in numerous domestic and wild birds (Shutler *et al.*, 2004; reviewed by Davis, 2009). Thus, leucocyte profiles (also called white blood cell differentials) are commonly used by veterinarians to assess animal health (e.g. Charles-Smith *et al.*, 2014; Wojczulanis-Jakubas *et al.*, 2014). Evidence also suggests that elevated H:L ratios may be associated with deleterious effects, such as slower growth, increased risk of infection and decreased survival (Davis, 2009).

The Arctic is home to millions of migratory birds and is a relatively pristine region, which is now experiencing rapid environmental change due to a more variable climate. A warmer climate may lead to higher parasitism rates (Marcogliese, 2001; Kutz *et al.*, 2004; Gaston and Elliott, 2013), and increased investment in immunity may result. Many parts of the Arctic are expected to experience increased industrial activity, shipping and tourism in the near future (ACIA, 2005; Arctic Council, 2009). Elsewhere in Arctic regions, scientists have conducted sampling to establish reference ranges for haematological parameters in marine birds, as baseline metrics by which the possible effects of environmental perturbation can be assessed (e.g. Newman *et al.*, 1997; Bearhop *et al.*, 1999). However, few studies have been undertaken in the Canadian Arctic (see Edwards *et al.*, 2006) or Iceland; therefore, establishing current reference values is important. In this study, we had the following two objectives: (i) to generate reference ranges for leucocyte profiles of breeding Arctic marine birds in Canada and Iceland; and (ii) to assess whether differences occur within species among breeding sites. Typical environmental conditions mean that many Arctic birds have a short window of time in which to breed; indeed, the time spent gathered at a colony between

arrival and initiation of breeding may be dramatically reduced compared to conspecifics breeding farther south (e.g. Mallory and Forbes, 2007). Given that physical stresses of migration can also elevate H:L ratios in birds (e.g. Owen and Moore, 2006), we predicted that for species sampled from multiple colonies that varied in (i) the distance travelled by individuals for pre-breeding migration and (ii) the distance flown by individuals from their foraging ground to their breeding colony, H:L ratios would be higher for birds that had to travel farther to reach their breeding colony.

## Materials and methods

We collected data on marine bird leucocyte profiles in field seasons between 2004 and 2013 (Table 1). In Canada, northern fulmars (*Fulmarus glacialis*; hereafter fulmars) and black guillemots (*Cepphus grylle*; hereafter guillemots) were sampled at Cape Vera, Nunavut (76°15' N, 89°15' W; Fig. 1). Common eiders (*Somateria mollissima*; hereafter eiders) and Arctic terns (*Sterna paradisaea*; hereafter terns) were sampled at East Bay, Nunavut (64°01' N, 81°47' W). Terns, Sabine's gulls (*Xema sabini*) and eiders were sampled at Nasaruaalik Island, Nunavut (75°49' N, 96°18' W), and eiders were also sampled at colonies around Nova Scotia (Eastern Shore Islands, 44°54' N, 62°15' W; Bon Portage Island, 43°28' N, 65°45' W; and John's Island, 43°32' N, 65°47' W). Thick-billed murrelets (*Uria lomvia*; hereafter murrelets) were sampled at both Coats Island (62°57' N, 82° W) and Digges Sound (62°33' N, 77°43' W), Nunavut. In Iceland, guillemots, fulmars, eiders and Atlantic puffins (*Fratercula arctica*; hereafter puffins) were sampled at Flatey (65°22' N, 22°55' W), while great skuas (*Stercorarius skua*; hereafter skuas) were sampled at Breiðamerkursandur (63°29' N, 16°21' W). In Alaska, black-legged kittiwakes (*Rissa tridactyla*) were sampled at Middleton Island (63°29' N, 16°21' W). All eiders sampled were nesting females, although we captured both males and females of other species (sex not determined). To minimize bias associated with seasonal variations in leucocyte profiles (e.g. Owen and Moore, 2006), all birds were captured during mid-incubation (approximately second or third week) at their nests by net or noose pole, except for some eiders in Nova Scotia caught at their nest by trained dogs. Birds nesting at each colony are fairly synchronous in the timing of breeding, particularly in the Arctic (e.g. Mallory and Forbes, 2007), and we sampled typically over a few days in mid-incubation to minimize the risk of abandonment due to disturbance at the nest and to reduce variation resulting from possible changing stress levels during incubation. Fulmars, murrelets and puffins typically lay one egg, guillemots, terns and skuas lay two eggs, gulls generally lay two to three eggs, and eiders generally lay more than three eggs; however, we did not control for clutch size in this study. Blood was extracted from the brachial, jugular or tarsal vein within 3 min of capture using a 22 gauge, 0.7 mm needle and a 3 ml syringe. One drop of blood was then put onto a microscope slide, and a smear was made following standard procedures (Bennett, 1970). Slides were left to air dry, then dipped in alcohol and again left to air dry before being stored.

**Table 1:** Leucocyte profiles of Arctic marine bird species

| Common name            | Scientific name             | Region    | Colony             | Year | n  | Mean (SEM) proportion of leucocytes per 100 counted |             |            |             |            |                  | Mean (SEM), CV<br>Hi:L ratio |
|------------------------|-----------------------------|-----------|--------------------|------|----|-----------------------------------------------------|-------------|------------|-------------|------------|------------------|------------------------------|
|                        |                             |           |                    |      |    | Heterophils                                         | Eosinophils | Basophils  | Lymphocytes | Monocytes  |                  |                              |
| Northern fulmar        | <i>Fulmarus glacialis</i>   | High      | Cape Vera          | 2004 | 31 | 32.0 (2.5)                                          | 13.5 (2.0)  | 2.2 (0.3)  | 61.4 (2.6)  | 4.4 (0.4)  | 0.61 (0.07), 65  |                              |
|                        |                             | High      | Cape Vera          | 2006 | 16 | 35.0 (4.5)                                          | 4.0 (0.9)   | 2.0 (0.5)  | 55.1 (4.0)  | 3.9 (0.7)  | 0.95 (0.33), 138 |                              |
|                        |                             | Iceland   | Flatey             | 2007 | 21 | 25.3 (1.7)                                          | 1.1 (0.5)   | 10.7 (2.0) | 57.1 (2.5)  | 5.7 (0.6)  | 0.47 (0.04), 40  |                              |
| Common eider           | <i>Somateria mollissima</i> | Iceland   | Flatey             | 2007 | 18 | 28.3 (2.7)                                          | 14.4 (2.6)  | 0.7 (0.2)  | 50.2 (3.0)  | 6.4 (0.7)  | 0.63 (0.08), 57  |                              |
|                        |                             | Low       | East Bay           | 2004 | 46 | 56.8 (1.9)                                          | 2.2 (0.4)   | 2.2 (0.5)  | 36.5 (1.8)  | 2.2 (0.2)  | 1.81 (0.15), 56  |                              |
|                        |                             | Low       | East Bay           | 2008 | 19 | 47.2 (1.6)                                          | 8.8 (1.2)   | 0.3 (0.1)  | 32.9 (2.2)  | 10.8 (1.2) | 1.56 (0.11), 32  |                              |
|                        |                             | High      | Nasaruvaalik       | 2008 | 19 | 55.0 (2.3)                                          | 2.5 (0.4)   | 0 (0)      | 35.8 (1.9)  | 6.6 (0.7)  | 1.70 (0.19), 49  |                              |
|                        |                             | Maritimes | Various            | 2013 | 89 | 44.1 (1.6)                                          | 3.6 (0.4)   | 1.1 (0.2)  | 44.3 (1.4)  | 5.0 (0.4)  | 1.18 (0.08), 64  |                              |
| Great skua             | <i>Stercorarius skua</i>    | Iceland   | Breiðamerkursandur | 2008 | 15 | 36.7 (3.0)                                          | 4.1 (0.6)   | 0.4 (0.2)  | 52.5 (3.3)  | 6.2 (0.8)  | 0.85 (0.18), 81  |                              |
| Black-legged kittiwake | <i>Rissa tridactyla</i>     | Alaska    | Middleton          | 2012 | 31 | 51.4 (2.9)                                          | 2.7 (0.5)   | 0.2 (0.1)  | 42.0 (3.0)  | 3.8 (0.6)  | 1.91 (0.41), 120 |                              |
| Sabine's gull          | <i>Xema sabini</i>          | Low       | East Bay           | 2007 | 6  | 39.7 (6.5)                                          | 1.7 (0.8)   | 5.0 (1.7)  | 44.5 (3.7)  | 9.1 (2.8)  | 0.99 (0.24), 59  |                              |
|                        |                             | High      | Nasaruvaalik       | 2008 | 12 | 45.9 (4.0)                                          | 3.4 (1.1)   | 0.3 (0.2)  | 41.7 (3.5)  | 8.6 (1.1)  | 1.28 (0.20), 56  |                              |
| Arctic tern            | <i>Sterna paradisaea</i>    | Low       | East Bay           | 2007 | 19 | 32.9 (3.5)                                          | 8.1 (1.1)   | 3.4 (0.5)  | 51.1 (3.2)  | 4.4 (0.6)  | 0.79 (0.14), 78  |                              |
|                        |                             | High      | Nasaruvaalik       | 2007 | 14 | 25.7 (2.5)                                          | 0.7 (0.3)   | 1.1 (0.4)  | 61.2 (2.5)  | 11.2 (1.5) | 0.45 (0.06), 49  |                              |
|                        |                             | Low       | East Bay           | 2008 | 19 | 34.0 (2.6)                                          | 7.2 (0.9)   | 0.3 (0.1)  | 45.3 (2.7)  | 13.3 (1.6) | 0.86 (0.11), 56  |                              |
|                        |                             | High      | Nasaruvaalik       | 2008 | 23 | 39.2 (2.3)                                          | 8.6 (1.0)   | 0.3 (0.1)  | 44.5 (2.2)  | 7.4 (0.9)  | 1.00 (0.12), 59  |                              |
| Thick-billed murre     | <i>Uria lomvia</i>          | Low       | Digges             | 2008 | 15 | 49.7 (2.6)                                          | 7.7 (0.9)   | 0.2 (0.1)  | 28.1 (2.4)  | 14.2 (1.5) | 2.18 (0.36), 64  |                              |
|                        |                             | Low       | Coats              | 2008 | 62 | 43.2 (1.0)                                          | 6.4 (0.5)   | 1.0 (0.6)  | 39.1 (0.9)  | 10.3 (0.7) | 1.19 (0.07), 47  |                              |
|                        |                             | Low       | Coats              | 2011 | 53 | 55 (0.5)                                            | 5.6 (4.0)   | 0.5 (1.1)  | 25.7 (10.5) | 13.0 (5.8) | 2.97 (0.49), 120 |                              |
| Black guillemot        | <i>Cephus grylle</i>        | Iceland   | Flatey             | 2007 | 16 | 32.8 (2.7)                                          | 1.8 (0.5)   | 0.3 (0.2)  | 54.3 (2.5)  | 10.8 (1.2) | 0.74 (0.12), 63  |                              |
|                        |                             | High      | Cape Vera          | 2006 | 25 | 38.2 (1.2)                                          | 3.6 (0.5)   | 2.2 (0.4)  | 44.3 (1.4)  | 11.7 (1.1) | 0.90 (0.05), 27  |                              |
| Atlantic puffin        | <i>Fratercula arctica</i>   | Iceland   | Flatey             | 2007 | 9  | 45.1 (5.0)                                          | 0.7 (0.3)   | 0.5 (0.2)  | 47.2 (4.4)  | 6.4 (1.6)  | 1.13 (0.25), 66  |                              |

Regions are generalized as High (Canadian High Arctic), Low (Canadian Low Arctic), Iceland, Maritimes (Canada) and Alaska; within these regions, colony is the specific colony location where samples were taken. Abbreviations: CV (%), coefficient of variation; and Hi:L ratio, heterophil-to-lymphocyte ratio.

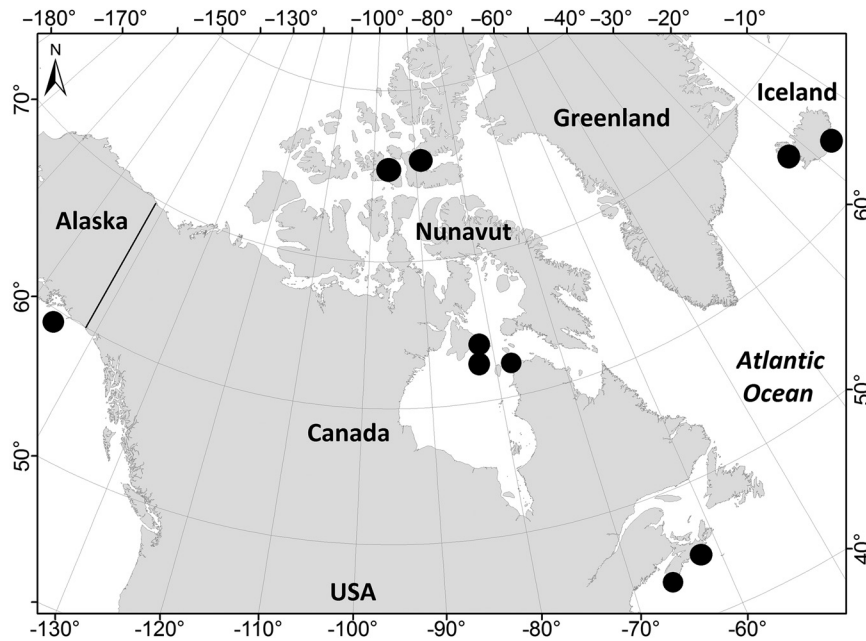

**Figure 1:** Colony locations (black dots) for all marine birds sampled in this study.

In preparation for conducting leucocyte differential counts, slides were stained using Wright's staining method. Leucocyte counts were conducted at  $\times 1000$  magnification using oil immersion. To assess ratios of leucocyte cell types, we counted 100 leucocytes for each blood smear and categorized leucocytes using morphological characteristics (Lucas and Jamroz, 1961). Heterophils, eosinophils, basophils, lymphocytes and monocytes were all included in the counts, but thrombocytes were excluded. Slides were counted principally by C.M.L. (68% of total) and E.S.B. (15%), both of whom were trained by D.S., although kittiwakes and 2011 murres (17%) were counted by K.H.E. E.S.B. recounted a subset of slides ( $n = 39$ ) initially counted by C.M.L. to assess repeatability; recount values for heterophils and lymphocytes were within  $4.0 \pm 0.7\%$  SEM and  $3.5 \pm 0.7\%$  SEM, respectively. Other blood cell types were less common and repeatability counts were less reliable (i.e. error between counts  $>50\%$  of mean occurrence), and thus we present proportional occurrence data but do not include these in analyses. Collectively, we obtained 578 readable slides from nine marine bird species.

We compared natural logarithmically transformed H:L ratios among species and among locations using Welch's  $t$ -tests or Mann–Whitney Wilcoxon tests for pairwise comparisons, or Kruskal–Wallis tests (followed by Dunn's multiple comparison test) or ANOVA (followed by Tukey–Kramer multiple comparisons test; GraphPad Software, Inc., 2009). We also completed a principal component analysis on all arcsine–square root-transformed leucocyte profile data from northern seabirds to examine overall patterns among species and functional groups (Buehler *et al.*, 2011). Means are presented  $\pm$ SEM.

## Results

### Comparisons within species

The proportion of different leucocytes exhibited considerable variation within species and years (Table 1). For example, common eiders sampled at four colony locations exhibited significantly different H:L ratios (Table 1 and Fig. 2; ANOVA,  $F_{3,187} = 14.5$ ,  $P < 0.001$ ), with eiders at each location having different mean H:L ratios from all other locations (all  $P \leq 0.05$ ), except for eiders at Nasaruaalik Island and East Bay, which did not differ significantly from each other. When we compared H:L ratios with migration distance, birds that migrated farther had higher H:L ratios ( $r_{s188} = 0.48$ ,  $P < 0.001$ ). Moreover, we saw some consistency among years for eiders; H:L ratios at Easy Bay in 2005 ( $1.56 \pm 0.49$ ) were similar to those from 2008 ( $1.84 \pm 0.91$ ;  $t_{58} = 1.6$ ,  $P = 0.12$ ). Murres also exhibited intercolony differences, with H:L ratios higher at Digges ( $2.17 \pm 0.36$ ) than Coats ( $1.19 \pm 0.06$ ,  $t_{90} = 4.51$ ,  $P < 0.001$ ) and higher at Coats in 2011 than 2008 ( $2.97 \pm 0.49$ ,  $t_{128} = 8.29$ ,  $P < 0.001$ ). Guillemots breeding in the high Arctic had a higher mean H:L ratio than those breeding in Iceland (Table 1; Welch's  $t$ -test,  $t_{24} = 3.0$ ,  $P = 0.006$ ). For Arctic terns sampled at East Bay and Nasaruaalik Island in 2007 and 2008, significant differences in H:L ratios were found (Table 1;  $F_{3,71} = 3.3$ ,  $P < 0.05$ ), but this was attributable to low ratios (and low variation) in 2007 and high values in 2008 at Nasaruaalik Island ( $P < 0.05$ ). However, for the other species, H:L ratios did not differ statistically among locations (Table 1; Sabine's gulls:  $t_{12} = 0.9$ ,  $P = 0.37$ ), despite a twofold difference in mean H:L ratios for fulmars between

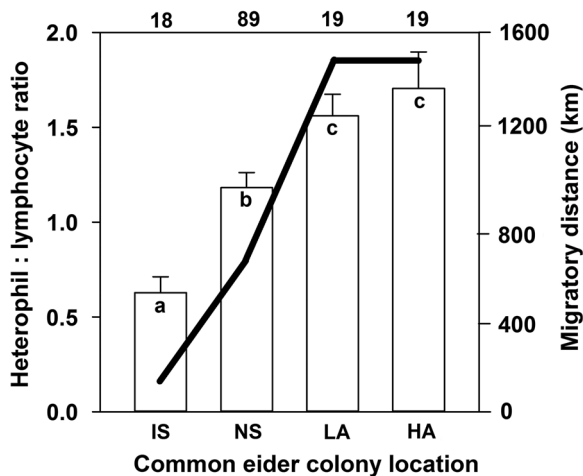

**Figure 2:** Mean (SEM) heterophil-to-lymphocyte ratios for common eiders (*Somateria mollissima*) sampled across the western North Atlantic and Canadian Arctic as follows: IS, Iceland; NS, Nova Scotia (Canada); LA, Canadian Low Arctic; and HA, Canadian High Arctic. The right-hand y-axis is the approximate migration distance (in kilometres) from wintering to breeding grounds, represented by the line in the graph; sample sizes are above bars. Bars significantly different from each other denoted with different letters.

some site-years (Kruskal–Wallis test,  $KW = 1.2$ ,  $P = 0.54$ ), presumably because of high annual, within-site variation.

### Comparisons among species

The proportion of different leucocytes also exhibited high variation among species, although there were some overall similarities (Table 1). For most species, proportions of basophils were low (medians of 0–1%); fulmars had the highest median proportion of 5%. For eosinophils, median proportions differed among species, with the highest values for murres and terns (6%) and lowest for puffins (1%). Median proportions of monocytes were high in murres and guillemots (11%), with other species having proportions between 5 and 8% (Fig. 3). Overall, H:L ratios among species were fairly variable; the mean coefficient of variation for species' H:L ratios was  $66 \pm 28\%$ . We found significant differences in H:L ratios among marine bird species (Table 1;  $KW = 96.4$ ,  $P < 0.001$ ). Puffins, murres, eiders, kittiwakes and Sabine's gulls all had mean H:L ratios  $>1$  (Fig. 3). Fulmars had the lowest H:L ratios, which were significantly lower than those of murres, eiders and Sabine's gulls (all  $P < 0.001$ ). Murres also had higher H:L ratios than terns ( $P < 0.001$ ), guillemots ( $P < 0.01$ ) and skuas ( $P < 0.05$ ), and eider H:L ratios were also higher than those of terns ( $P < 0.001$ ). Collectively, these analyses allowed us to produce reference ranges (mean  $\pm$  2SD; Fig. 3) for the main leucocytes and H:L ratios for these species, against which future comparisons can be made.

Using data from this study (Table 1) and other studies on northern marine birds (Table 2), we ran a principal component analysis on the five leucocyte types, which separated bird groups by study and species. The first principal component

explained 82.5% of the variance and the second explained 11.0% (Fig. 4). The proportion of heterophils and lymphocytes loaded heavily on the first axis (Fig. 4). Several groups, including small Pacific auks, fulmars, Alcini, *Sterna* terns, puffins and large gulls tended to cluster together, which may represent similarity of leucocyte profiles due to ancestry and/or environment. Others, notably guillemots and especially eiders, did not cluster.

### Discussion

Our study is the largest reported haematological sampling of marine birds in northern waters to date, and our results share some similarities with earlier work. For example, fulmars appear to have consistently low H:L ratios compared with other species (Newman *et al.*, 1997; Edwards *et al.*, 2006; present study), which may be characteristic of the family Procellariidae (Work, 1996; Uhart *et al.*, 2003); however, albatrosses appear to have high proportions of heterophils (e.g. Work, 1996), and thus low H:L ratios are not consistent within the entire Order Procellariiformes. Across many marine birds, basophils tend to be the least common of the leucocytes, consistent with our results, but among our species we found median proportions of 5–11% monocytes, generally higher than reported elsewhere (reviewed by Davis *et al.*, 2008; Davis, 2009). We also observed high variation among individuals within a species, as has been reported by Newman *et al.* (1997). Moreover, we found considerable variation among studies, even for the same species or closely related species. As pointed out by Bearhop *et al.* (1999), sex, age, stage of season and various environmental differences all influence bird blood metrics, making comparisons among studies challenging. Nonetheless, many taxonomic groups clustered together across studies and sites (Fig. 4), suggesting that with additional data our reference values for a particular group can be verified. Exceptions were common eiders and guillemots that had particularly large latitudinal ranges; perhaps one reason that those species could exist in such variable climates is that their physiology is particularly adaptable.

Despite these challenges, our first priority was to generate a set of reference values for the various species, as a baseline against which future samples can be compared. This rationale has been adopted in other studies where there is potential for future industrial activity that could affect marine birds (e.g. Newman *et al.*, 1997; Bearhop *et al.*, 1999). In other cases, haematological parameters have been applied as one metric by which to measure long-term effects of marine pollution accidents on local bird populations (e.g. Seiser *et al.*, 2000). In the present study, birds sampled from High and Low Arctic populations are effectively naive to industrial activity during their breeding season, but that will change in the near future with proposed increases in shipping activity as part of industrial expansion for ore extraction, supply shipping and tourism (Arctic Council, 2009). In generating these reference values, it is clear that there is variation in mean blood cell counts among specific sampling sites or regions, and thus applying average

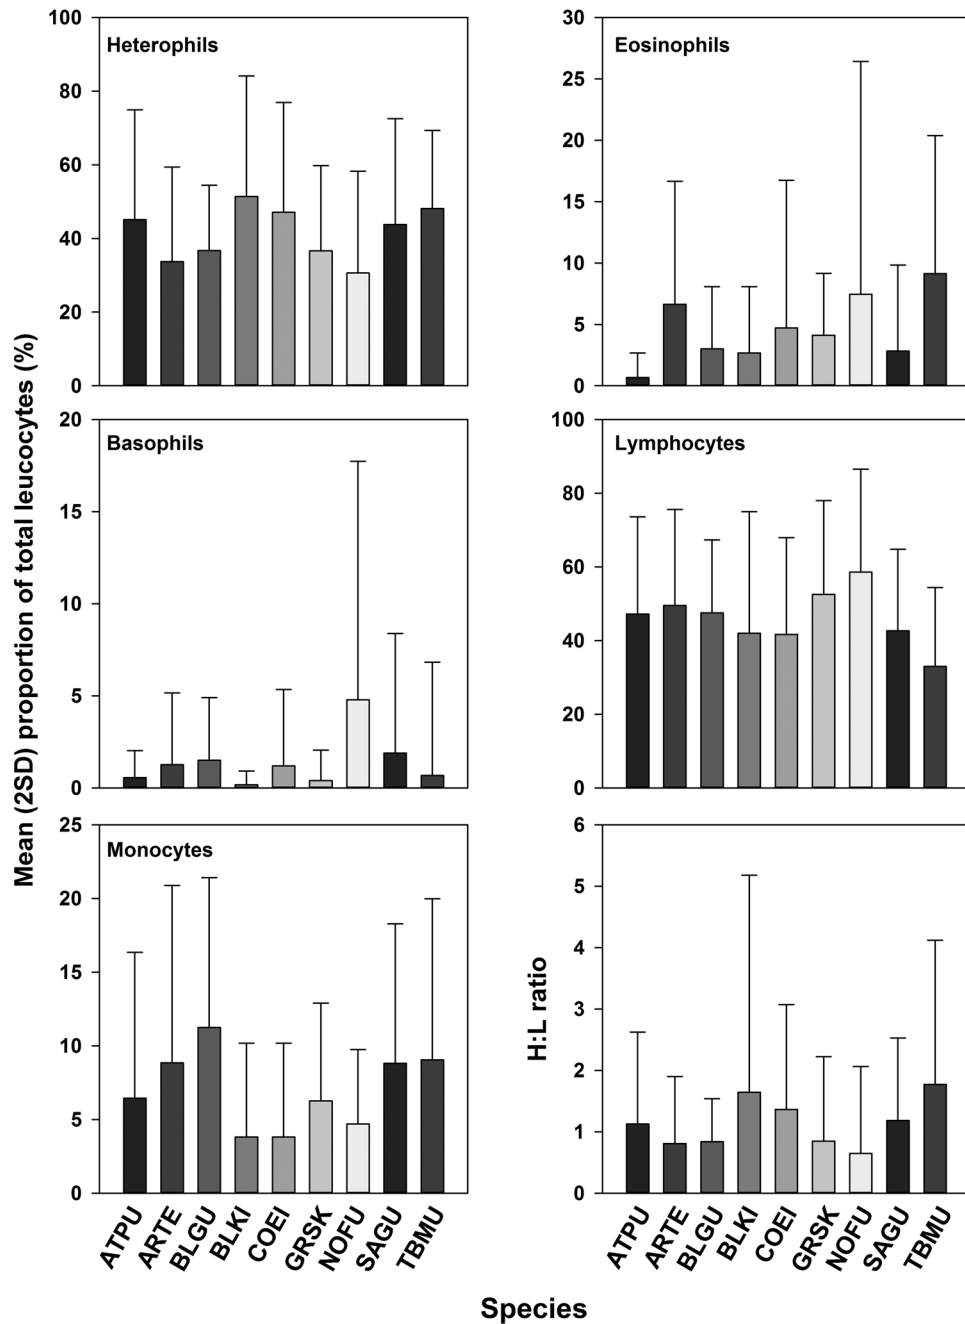

**Figure 3:** Mean (2SD) reference ranges of proportions of heterophils, eosinophils, basophils lymphocytes, monocytes and heterophil-to-lymphocyte ratios for nine different marine bird species sampled across the western North Atlantic and Canadian Arctic, as follows: Atlantic puffin (*Fratercula arctica*; ATPU), Arctic tern (*Sterna paradisaea*; ARTE), black guillemot (*Cepphus grylle*; BLGU), black-legged kittiwake (*Rissa tridactyla*; BLKI), common eider (*Somateria mollissima*; COEI), great skua (*Stercorarius skua*; GRSK), northern fulmar (*Fulmarus glacialis*; NOFU), Sabine’s gull (*Xema sabini*; SAGU) and thick-billed murre (*Uria lomvia*; TBMU). Sample sizes are given in Table 1.

values from a different study, or even a different colony, may not be entirely appropriate, although we believe that this may vary by taxon (see above). We propose that the variation may be due, at least in part, to migration distances and resulting time constraints experienced by northern birds.

We found some support for our hypothesis that H:L ratios would be elevated at colonies where individuals migrated or commuted farther than conspecifics at other colonies. Eiders that had the longest migrations (High and Low Arctic birds, >1500 km; Mosbech *et al.*, 2006) had higher H:L ratios than

**Table 2:** Leucocyte profiles of species from selected studies on species in the northern hemisphere

| Common name             | Scientific name                  | n   | Mean proportion of leucocytes |             |           |             |           |      | H:L ratio                     | Source |
|-------------------------|----------------------------------|-----|-------------------------------|-------------|-----------|-------------|-----------|------|-------------------------------|--------|
|                         |                                  |     | Heterophils                   | Eosinophils | Basophils | Lymphocytes | Monocytes |      |                               |        |
| Northern fulmar         | <i>Fulmarus glacialis</i>        | 5   | 29.0                          | 13.0        | 0.0       | 56.0        | 2.0       | 0.52 | Newman <i>et al.</i> (1997)   |        |
| Black-legged Kittiwake  | <i>Rissa tridactyla</i>          | 10  | 30.0                          | 5.0         | 0.0       | 62.0        | 2.0       | 0.48 | Newman <i>et al.</i> (1997)   |        |
| Glaucous-winged gull    | <i>Larus glaucescens</i>         | 8   | 53.0                          | 3.0         | 0.0       | 43.0        | 1.0       | 1.23 | Newman <i>et al.</i> (1997)   |        |
| Great black-backed gull | <i>Larus marinus</i>             | 34  | 35.2                          | 0.7         | 2.0       | 61.0        | 2.2       | 0.58 | Averbeck (1992)               |        |
| Herring gull            | <i>Larus argentatus</i>          | 103 | 35.5                          | 0.9         | 2.0       | 60.9        | 1.3       | 0.58 | Averbeck (1992)               |        |
| Sooty tern              | <i>Onychoprion fuscatus</i>      | 152 | 56.7                          | 0.3         | 2.9       | 35.3        | 4.8       | 1.61 | Grasman <i>et al.</i> (2000)  |        |
| Common tern             | <i>Sterna hirundo</i>            | 34  | 24.7                          | 5.8         | 1.3       | 67.3        | 0.8       | 0.37 | Work (1996)                   |        |
| Ancient murrelet        | <i>Synthliboramphus antiquus</i> | 33  | 38.0                          | 9.1         | 0.0       | 51.0        | 5.6       | 0.75 | Fiorello <i>et al.</i> (2009) |        |
| Crested auklet          | <i>Synthliboramphus antiquus</i> | 9   | 21.0                          | 9.0         | 1.0       | 69.0        | 2.0       | 0.30 | Newman <i>et al.</i> (1997)   |        |
| Horned puffin           | <i>Aethia cristatella</i>        | 7   | 22.0                          | 4.0         | 1.0       | 70.0        | 4.0       | 0.31 | Newman <i>et al.</i> (1997)   |        |
| Marbled murrelet        | <i>Fratercula corniculata</i>    | 18  | 32.0                          | 7.0         | 1.0       | 57.0        | 4.0       | 0.56 | Newman <i>et al.</i> (1997)   |        |
| Parakeet auklet         | <i>Brachyramphus marmoratus</i>  | 1   | 26.0                          | 9.0         | 2.0       | 63.0        | 1.0       | 0.41 | Newman <i>et al.</i> (1997)   |        |
| Pigeon guillemot        | <i>Aethia psittacula</i>         | 21  | 37.0                          | 2.0         | 0.0       | 59.0        | 2.0       | 0.63 | Newman <i>et al.</i> (1997)   |        |
| Tufted puffin           | <i>Cepphus columba</i>           | 9   | 47.0                          | 5.0         | 0.0       | 47.0        | 1.0       | 1.00 | Newman <i>et al.</i> (1997)   |        |
| Dovekie                 | <i>Alle alle</i>                 | 17  | 61.0                          | 0.7         | 1.1       | 37.0        | 0.0       | 1.65 | Seiser <i>et al.</i> (2000)   |        |
| Great skua              | <i>Lunda cirrhata</i>            | 30  | 37.0                          | 4.0         | 1.0       | 57.0        | 3.0       | 0.65 | Newman <i>et al.</i> (1997)   |        |
|                         | <i>Alle alle</i>                 | 23  | 37.0                          | 9.0         | 5.0       | 38.0        | 8.0       | 0.97 | Jakubas <i>et al.</i> (2008)  |        |
|                         | <i>Stercorarius skua</i>         | 49  | 44.9                          | 1.4         | 2.8       | 34.4        | 5.5       | 1.31 | Bearhop <i>et al.</i> (1999)  |        |

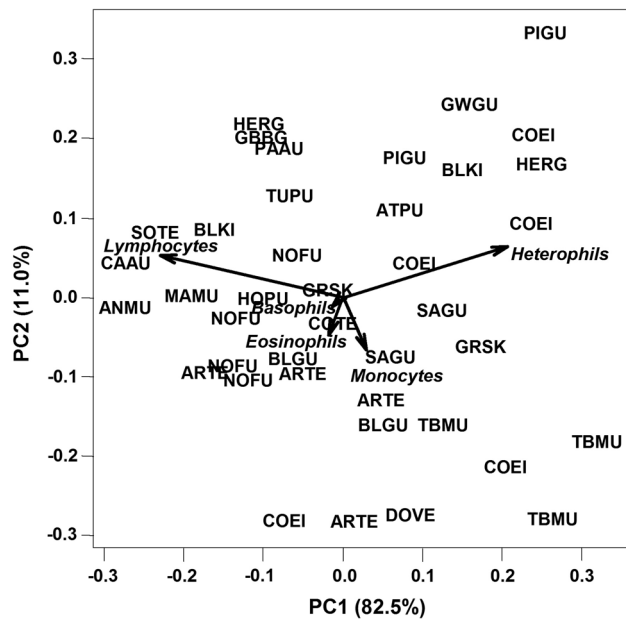

**Figure 4:** Principal component analysis of average seabird leucocyte profiles. Each represents the average value for a particular study, from Tables 1 and 2. Guilds were grouped as follows: puffins [ATPU, Atlantic puffin; TOPTU, tufted puffin (*Fratercula cirrhata*); and HOPU, horned puffin (*F. corniculata*)]; small Pacific auks [PAAU, parakeet auklet (*Cyclorhynchus psittacula*); MAMU, marbled murrelet (*Brachyramphus marmoratus*); ANMU, ancient murrelet (*Synthliboramphus antiquus*); and CAAU, crested auklet (*Aethia cristatella*)]; Alcini [TBMU, thick-billed murre; and DOVE, dovekie (*Alle alle*)]; guillemots [BLGU, black guillemot; and PIGU, pigeon guillemot (*Cepphus columba*)]; Procellariiformes [NOFU, northern fulmar]; ducks [COEI, common eider]; terns [ARTE, Arctic tern; COTE, common tern (*Sterna hirundo*); and SOTE, sooty terns (*Onychoprion fuscatus*)]; and gulls [HERG, herring gull (*Larus argentatus*); BLKI, black-legged kittiwake (*Rissa tridactyla*); GBBG, great black-backed gull (*Larus marinus*); GWGU, glaucous-winged gull (*Larus glaucescens*); SAGU, Sabine's gull (*Xema sabini*); and GRSK, great skua (*Stercorarius skua*)].

those that had shorter migrations (Nova Scotia, 700 km; M. L. Mallory, unpublished data). These, in turn, had higher ratios than those that hardly migrated at all (Iceland, ~100 km; Petersen, 1998). Likewise, High Arctic guillemots, presumably migrating as far as the eiders due to ice patterns, had higher ratios than guillemots in Iceland (some of which migrate to Greenland but many of which do not; Petersen, 1977). However, we found no significant differences in H:L ratios for birds from different colonies of Sabine's gulls, fulmars or terns, despite an approximate 3000 km difference in average migration distance between the locations that we sampled (Mallory *et al.*, 2008; Egevang *et al.*, 2010; Davis, 2015). Unlike eiders and guillemots, however, these species are all long-distance migrants; the 3000 km difference represents ~20% or less of the total migration distance from wintering to breeding sites of each of these species compared with an increase of 1500 km (two to 10 times greater than the migration distance of eiders from the other colonies). Eiders and guillemots also have higher wing loadings and are less efficient

fliers than the other species (e.g. Greenwalt, 1962; Alerstam *et al.*, 2007; Elliott *et al.*, 2013); an increase of 1500 km may create greater stress for those species. In addition, H:L ratios were higher at the larger Digges Island colony, where birds commute almost twice as far due to stronger intraspecific competition (Gaston *et al.*, 2013). Murres have the highest relative flight costs of any bird studied to date (Elliott *et al.*, 2013) and would therefore be expected to be particularly susceptible to activity stress. Thus, we suggest that efficiency of flight and the distance flown must influence stress levels in these species, which may be reflected in increased H:L ratios during incubation.

Other than simply the stress of having to migrate farther, differences in environmental conditions on the breeding grounds and migration distance among colonies may have indirect effects on H:L ratios of eiders and other High Arctic nesters; birds at the High Arctic colony may arrive with less time before they start laying. This could leave birds with less time to invest resources in immunity on the breeding grounds (i.e. to reallocate resources that have been shunted to deal with energetic needs of migration) and would thus result in H:L ratios that may be diminishing, but would be relatively high post-migration compared with those of birds at southern colonies that arrived long before breeding. We do not know how long it takes H:L ratios to return to 'normal' after prolonged stress in these wild species, but in one experimental study it took 10 days for quail H:L ratios to return to normal after short-term exposure to a corticosteroid (Aengwanich and Chinrarsi, 2003). Arctic birds have a short window of time in which to breed and, moreover, may arrive when there is still ice and snow covering their breeding habitats. Thus, they often adjust their breeding schedules to accommodate annual variation. In fulmars, pre-breeding activities at High Arctic colonies are markedly reduced compared with fulmars elsewhere in the range, including Alaska (Mallory and Forbes, 2007). Newman *et al.* (1997) found that mean H:L ratios in Alaskan marine birds, including many alcids, were generally less than one (Table 2). Those sites in Alaska are generally ice free, and some of the species have very short migrations (e.g. crested auklet, *Aethia cristatella*). In contrast, Jakubas *et al.* (2008) found H:L ratios near one in dovekeys (*Alle alle*) from Svalbard, a location where birds would have to deal with sea ice, at least early in the season. In our study, the only diving bird with mean H:L ratios less than one were guillemots, even the High Arctic birds (Table 1). That High Arctic colony may be a special case, however, because it was situated in a polynya where birds may exploit the early open water and arrive at the breeding grounds months before breeding (Prach and Smith, 1992).

Collectively, we believe that our data provide key baseline references for colony-level comparisons of stress in the various marine bird species. Dehnhard *et al.* (2011) suggested that leucocyte profiles were blunt tools, but were sufficient to look at population (colony) level changes in stress, and we suggest a similar interpretation of our data. If researchers gather basic data on marine bird health regularly as part of standard protocols (e.g. Mallory *et al.*, 2010), annual variation in leucocyte



profiles may be detected and factors contributing to increased stress indicators can be more easily identified. In particular, reductions in sea ice leading to earlier nesting by some species (e.g. Gaston *et al.*, 2009) will change the dynamic between migration departure and nest initiation, presumably altering residual effects of migration stress on breeding birds and their H:L ratios proposed in this study. As evidence, the highest H:L ratios in the present study were from murre near their southern range limit, at Coats Island in 2011. That year was a particularly warm year and a period of high stress when polar bears (*Ursus maritimus*) and mosquitoes combined caused a 20% reduction in reproduction (Gaston and Elliott, 2013). Furthermore, water loss due to heat stress and mosquitoes caused very low haematocrits (Gaston and Elliott, 2013). Conducting such observations for 3 weeks was logistically difficult and time consuming; H:L ratios may be a simple and quick method for assessing population stress in response to a warmer climate. We believe that future investigations should test the following predictions: (i) across colonies and among individuals at a colony, the duration of pre-breeding periods at a colony is negatively related to H:L ratios during incubation; (ii) H:L ratios are lower for individual birds that initiate nesting later in the breeding season (controlling for body condition); and (iii) a progressive increase in H:L ratios during incubation will occur at Arctic colonies through time, as birds try to initiate nesting earlier to keep pace with earlier seasonal phenology of food supplies (e.g. Gaston *et al.*, 2009).

Our research focused on leucocyte profiles and stress, but there are many other metrics of immune function (Matson *et al.*, 2005; Millet *et al.*, 2007; Liebl *et al.*, 2009) and many other questions in the field of ecological immunology (Ardia and Schat, 2008; Martin *et al.*, 2011; Pedersen and Babayan, 2011). Blood smears are one of the easiest metrics to collect in field conditions, and leucocyte profiles are one of the most inexpensive metrics to use. For some investigations, leucocytes have drawbacks in interpretation (Norris and Evans, 2000), but H:L ratios are quite robust to evaluation (Davis *et al.*, 2008). In any case, future work should compare other metrics of immune function with results generated by blood smears.

## Acknowledgements

We are grateful to many field personnel who assisted in collecting blood samples and, in particular, Kelly Boadway, Isabel Buttler, Darryl Edwards, Rob Kelly, Ellen Magnusdottir, Carolyn Mallory, Mike O'Brien, Glen Parsons, Molly Tomlik and Emma Vost. Andy Davis and an anonymous reviewer provided valuable suggestions that improved the manuscript.

## Funding

Financial support was provided by Environment Canada, the Natural Sciences and Engineering Research Council, the Nova Scotia Department of Natural Resources and the Polar Continental Shelf Project.

## References

- ACIA (2005) Arctic climate impact assessment. ACIA overview report. Cambridge University Press, Cambridge, UK, 1020 pp.
- Aengwanich W, Chinrarsi O (2003) Effect of dexamethasone on differential white blood cell counts and heterophil/lymphocyte ratio in Japanese quails (*Coturnix coturnix japonica*). *Songklanakarin J Sci Technol* 25: 183–189.
- Alerstam T, Rosén M, Bäckman J, Ericson PGP, Hellgren O (2007) Flight speeds among bird species: allometric and phylogenetic effects. *PLoS Biol* 5: e197.
- Arctic Council (2009) Arctic marine shipping assessment 2009 report. [http://www.arctic.noaa.gov/detect/documents/AMSA\\_2009\\_Report\\_2nd\\_print.pdf](http://www.arctic.noaa.gov/detect/documents/AMSA_2009_Report_2nd_print.pdf).
- Ardia DR, Schat KA (2008) Ecoimmunology. In Kaspers B, Schat KA, eds, *Avian Immunology*. Elsevier Ltd, London.
- Averbeck C (1992) Haematology and blood chemistry of healthy and clinically abnormal great black-backed gulls (*Larus marinus*) and herring gulls (*Larus argentatus*). *Avian Pathol* 21: 215–223.
- Bearhop S, Griffiths R, Orr K, Furness RW (1999) The normal haematology of Great Skuas (*Catharacta skua*) in the wild. *Comp Haematol Int* 9: 107–109.
- Bennett GF (1970) Simple techniques for making avian blood smears. *Can J Zool* 48: 585–586.
- Buehler DM, Versteegh MA, Matson KD, Tieleman BI (2011) One problem, many solutions: simple statistical approaches help unravel the complexity of the immune system in an ecological context. *PLoS ONE* 6: e18592.
- Charles-Smith LE, Rutledge E, Meek CJ, Baine K, Massey E, Ellsaesser LN, DePerno CS, Moorman CE, Degernes LA (2014) Hematologic parameters and hemoparasites of nonmigratory Canada geese (*Branta canadensis*) from Greensboro, North Carolina, USA. *J Avian Med Surg* 28: 16–23.
- Davis AK (2009) The wildlife leukocytes webpage: the ecologist's source for information about leukocytes of wildlife species. <http://wildlife-hematology.uga.edu>.
- Davis SE (2015) Migration ecology of Sabine's Gulls (*Xema sabini*) from the Canadian high Arctic. MSc thesis. Memorial University of Newfoundland, St John's, NL.
- Davis AK, Maney DL, Maerz JC (2008) The use of leukocyte profiles to measure stress in vertebrates: a review for ecologists. *Funct Ecol* 22: 760–772.
- Deerenberg C, Arpanius V, Daan S, Bos N (1997) Reproductive effort decreases antibody responsiveness. *Proc Roy Soc Lond B Biol Sci* 264: 1021–1029.
- Dehnhard N, Poisbleau M, Demongin L, Quillfeldt P (2011) Do leucocyte profiles reflect temporal and sexual variation in body condition over the breeding cycle in Southern Rockhopper Penguins? *J Ornithol* 152: 759–768.
- Drent RH, Daan S (1980) The prudent parent – energetic adjustments in avian breeding. *Ardea* 68: 225–252.

- Edwards DB, Mallory ML, Forbes MR (2006) Variation in baseline haematology of northern fulmars (*Fulmarus glacialis*) in the Canadian high Arctic. *Comp Clin Pathol* 14: 206–209.
- Egevang C, Stenhouse IJ, Philips RA, Petersen A, Fox JW, Silk JRD (2010) Tracking of Arctic terns *Sterna paradisaea* reveals longest animal migration. *Proc Natl Acad Sci USA* 107: 2078–2081.
- Elliott KH, Ricklefs RE, Gaston AJ, Hatch SA, Speakman JR, Davoren GK (2013) High flight costs, but low dive costs, in auks support the bio-mechanical hypothesis for flightlessness in penguins. *Proc Natl Acad Sci USA* 110: 9380–9384.
- Fiorello CV, Nisbet ICT, Hatch JJ, Corsiglia C, Pokras MA (2009) Hematology and absence of hemoparasites in breeding common terns (*Sterna hirundo*) from Cape Cod, Massachusetts. *J Zoo Wildl Med* 40: 409–413.
- Gaston AJ, Elliott KH (2013) Effects of climate-induced changes in parasitism, predation and predator-predator interactions on reproduction and survival of an Arctic marine bird. *Arctic* 66: 43–51.
- Gaston AJ, Gilchrist HG, Mallory ML, Smith PA (2009) Changes in seasonal events, peak food availability and consequent breeding adjustment in a marine bird: a case of progressive mis-matching. *Condor* 111: 111–119.
- Gaston AJ, Elliott KH, Ropert-Coudert Y, Kato A, Macdonald CA, Mallory ML, Gilchrist HG (2013) Modeling foraging range for breeding colonies of thick-billed murres *Uria lomvia* in the Eastern Canadian Arctic and potential overlap with industrial development. *Biol Conserv* 168: 134–143.
- GraphPad Software, Inc. (2009) *Instat*. GraphPad Software Inc., La Jolla, CA.
- Grasman KA, Scanlon PF, Fox GA (2000) Geographic variation in haematological variables in adult and pre-fledgling herring gulls (*Larus argentatus*) and possible associations with organochlorine exposure. *Arch Environ Contam Toxicol* 38: 244–253.
- Greenwalt CH (1962) Dimensional relationships for flying animals. Smithsonian Miscellaneous Collections No. 144.
- Hanssen SA, Folstad I, Erikstad KE (2003) Reduced immunocompetence and cost of reproduction in common eiders. *Oecologia* 136: 457–464.
- Jakubas D, Wojczulanis-Jakubas K, Kreft R (2008) Sex differences in body condition and hematological parameters in little auk *Alle alle* during the incubation period. *Ornis Fenn* 85: 90–97.
- Kutz SJ, Hoberg EP, Nagy J, Polley L, Elkin B (2004) Emerging parasitic infections in arctic ungulates. *Integr Comp Biol* 44: 109–118.
- Lee KA (2006) Linking immune defenses and life history at the levels of the individual and the species. *Integr Comp Biol* 46: 1000–1015.
- Liebl AL, Martin LB II, Lynn B (2009) Simple quantification of blood and plasma antimicrobial capacity using spectrophotometry. *Funct Ecol* 23: 1091–1096.
- Lucas AM, Jamroz C. (1961) Atlas of Avian Hematology. Agriculture monograph 25, Department of Agriculture, Washington, DC.
- Maceda-Veiga A, Figuerola J, Martínez-Silvestre A, Viscor G, Ferrari N, Pacheco M (2015) Inside the Redbox: applications of haematology in wildlife monitoring and ecosystem health assessment. *Sci Total Environ* 514: 322–332.
- Mallory ML, Forbes MR (2007) Does sea-ice constrain the breeding schedules of High Arctic Northern Fulmars? *Condor* 109: 895–907.
- Mallory ML, Akearok J, Edwards DB, O'Donovan K, Gilbert CD (2008) Autumn migration and wintering of northern fulmars (*Fulmarus glacialis*) from the Canadian High Arctic. *Polar Biol* 31: 745–750.
- Mallory ML, Robinson SA, Hebert CE, Forbes ME (2010) Seabirds as indicators of marine ecosystem conditions: a case for gathering multiple proxies of seabird health. *Mar Pollut Bull* 60: 7–12.
- Marcogliese DJ (2001) Implications of climate change for parasitism of animals in the aquatic environment. *Can J Zool* 79: 1331–1352.
- Martin LB, Hawley DM, Ardia DR (2011) An introduction to ecological immunology. *Funct Ecol* 25: 1–4.
- Matson KD, Ricklefs RE, Klasing KC (2005) A hemolysis–hemagglutination assay for characterizing constitutive innate humoral immunity in wild and domestic birds. *Dev Comp Immunol* 29: 275–286.
- Millet S, Bennett J, Lee KA, Hau M, Klasing KC (2007) Quantifying and comparing constitutive immunity across avian species. *Dev Comp Immunol* 31: 188–201.
- Mosbech A, Gilchrist G, Flemming M, Sonne C, Flagstad A, Nyegaard H (2006) Year-round movements of Northern Common Eiders *Somateria mollissima borealis* breeding in Arctic Canada and West Greenland followed by satellite telemetry. *Ardea* 94: 651–665.
- Newman SH, Piatt JF, White J (1997) Hematological and plasma biochemical reference ranges of Alaskan seabirds: their ecological significance and clinical importance. *Waterbirds* 20: 492–504.
- Norris K, Evans MR (2000) Ecological immunology: life history trade-offs and immune defense in birds. *Behav Ecol* 11: 19–26.
- Owen JC, Moore FR (2006) Seasonal differences in immunological condition of three species of thrushes. *Condor* 108: 389–398.
- Pedersen AB, Babayan SA (2011) Wild immunology. *Mol Ecol* 20: 872–880.
- Petersen A (1977) Íslenskar teistur endurheimtar við Grænland and erlend teista við Ísland. [Icelandic Black Guillemots (*Cepphus grylle islandicus*) recovered in Greenland and Mandt's Guillemot (*C. g. mandtii*) recorded in Iceland.] *Náttúrufræðingurinn* 47: 149–153.
- Petersen A (1998) *Íslenskir Fuglar*. Vaka-Helgafell, Reykjavík, Iceland, 312 pp.
- Plischke A, Quillfeldt P, Lubjuhn T, Merino S, Masello JF (2010) Leucocytes in adult burrowing parrots *Cyanoliseus patagonus* in the wild: variation between contrasting breeding seasons, gender, and individual condition. *J Ornithol* 151: 347–354.
- Prach RW, Smith AR (1992) Breeding distribution and numbers of black guillemots in Jones Sound, N.W.T. *Arctic* 45: 111–114.
- Råberg L, Grahn M, Hasselquist D, Svensson E (1998) On the adaptive significance of stress-induced immunosuppression. *Proc R Soc Lond B Biol Sci* 265: 1637–1641.
- Roitt I, Brostoff J, Male D (1993) *Immunology*. Mosby, London.

- Seiser PE, Duffy LK, McGuire AD, Roby DD, Golet GH, Litzow MA (2000) Comparison of pigeon guillemot, *Cephus columba*, blood parameters from oiled and unoiled areas of Alaska eight years after the Exxon Valdez oil spill. *Mar Pollut Bull* 40: 152–164.
- Sheldon BC, Verhulst S (1996) Ecological immunology: costly parasite defences and trade-offs in evolutionary ecology. *Trends Ecol Evol* 11: 317–321.
- Shutler D, Mullie A, Clark RG (2004) Tree swallow reproductive investment, stress, and parasites. *Can J Zool* 82: 442–448.
- Stearns SC (1992) The evolution of life histories. Oxford University Press, London, 262 pp.
- Uhart MM, Quintana F, Karesh WB, Braselton WE (2003) Hematology, plasma biochemistry, and serosurvey for selected infectious agents in southern giant petrels from Patagonia, Argentina. *J Wildl Dis* 39: 359–365.
- Villanueva C, Walker BG, Bertellotti M (2012) A matter of history: effects of tourism on physiology, behaviour and breeding parameters in Magellanic Penguins (*Spheniscus magellanicus*) at two colonies in Argentina. *J Ornithol* 153: 219–228.
- Vleck CM, Vortalin N, Vleck D, Bucher TL (2000) Stress, corticosterone, and heterophil to lymphocyte ratios in free-living Adelie Penguins. *Condor* 102: 392–400.
- Wojczulanis-Jakubas K, Jakubas D, Kosmicka A, Jensen J-K (2014) Leg abnormalities and leucocyte profiles in the European Storm-petrel (*Hydrobates p. pelagicus*) from the Faroe Islands. *Wilson J Ornithol* 126: 739–745.
- Work TM (1996) Weights, hematology, and serum chemistry of seven species of free-ranging tropical pelagic birds. *J Wildl Dis* 32: 643–657.
